# Supplementary material
Source: PubMed Central journal article supplement (PMC8316124)
Supplement: iai.00721-20-s0001.pdf [file iai.00721-20-s0001.pdf]

**Fig. S1**

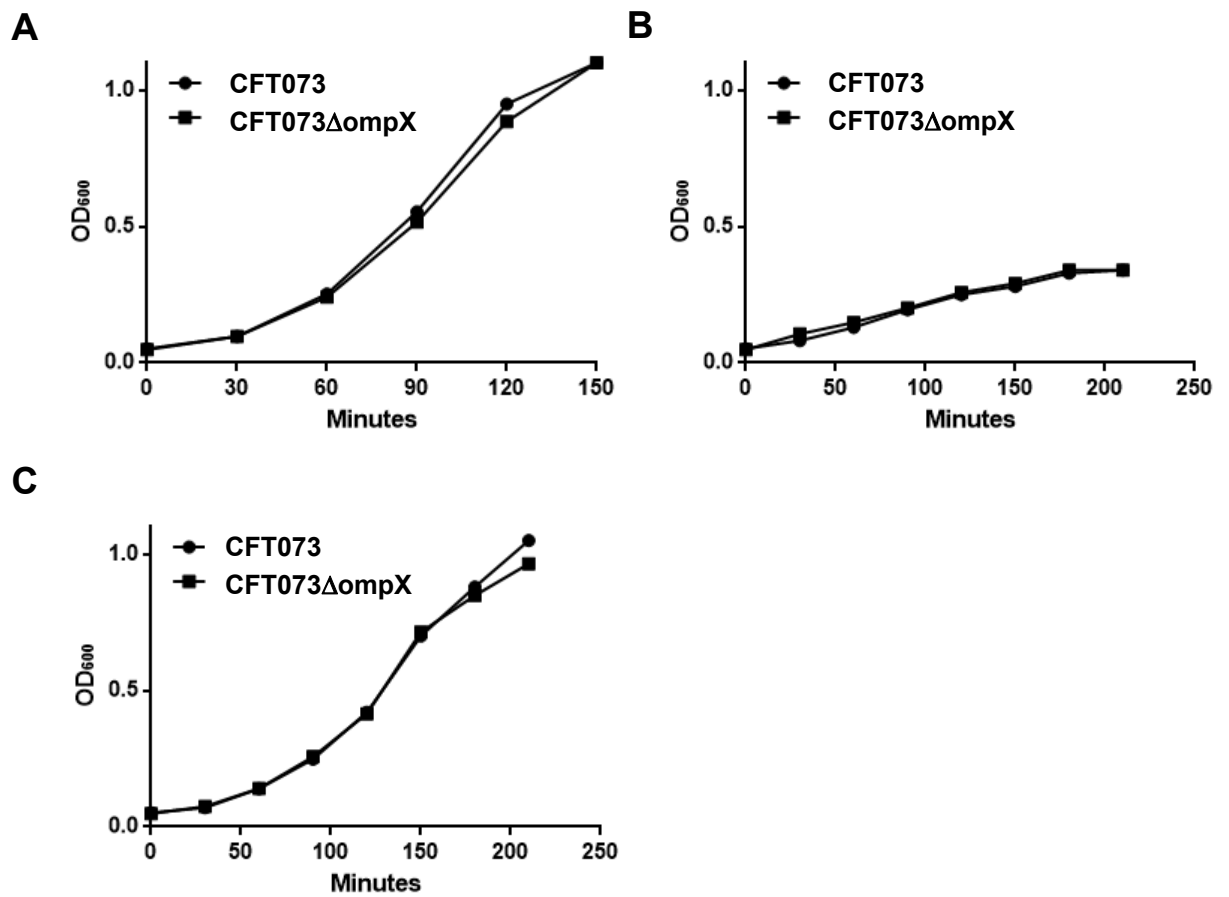

**Fig. S1.** Growth of the parent strain and *ompX* mutant. Both strains were grown in LB (A), AUM (B) and RPMI1640 (C) media at 37 ° C, then bacterial growth were monitored by measuring OD<sub>600</sub>.
